# Supplementary material
Source: PubMed Central journal article supplement (PMC1878513)
Supplement: JCI0728338sd.pdf [file JCI0728338sd.pdf]

## Supplementary Figure 1

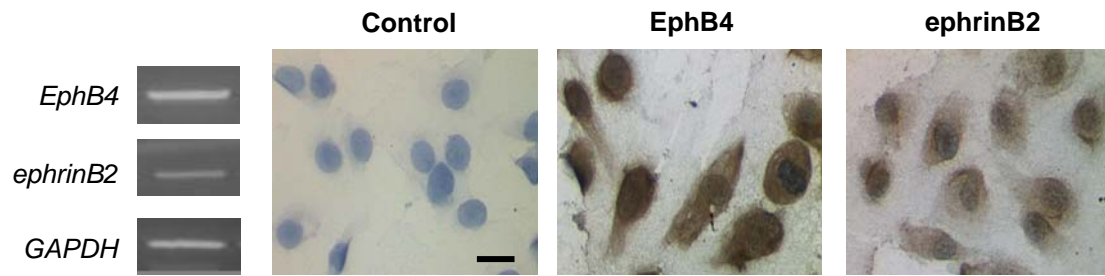

## Supplementary Figure 2

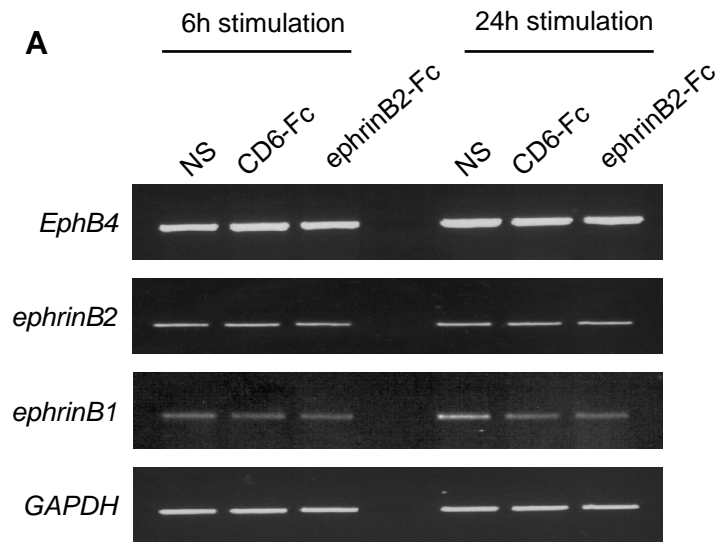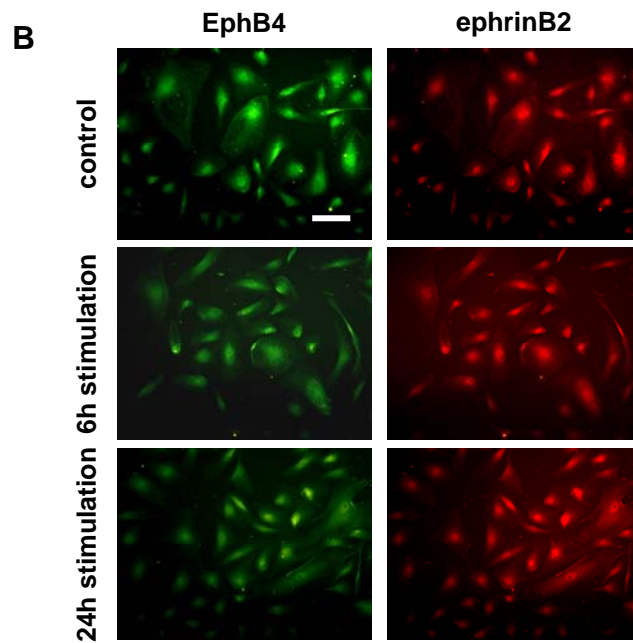

Supplementary Figure 3

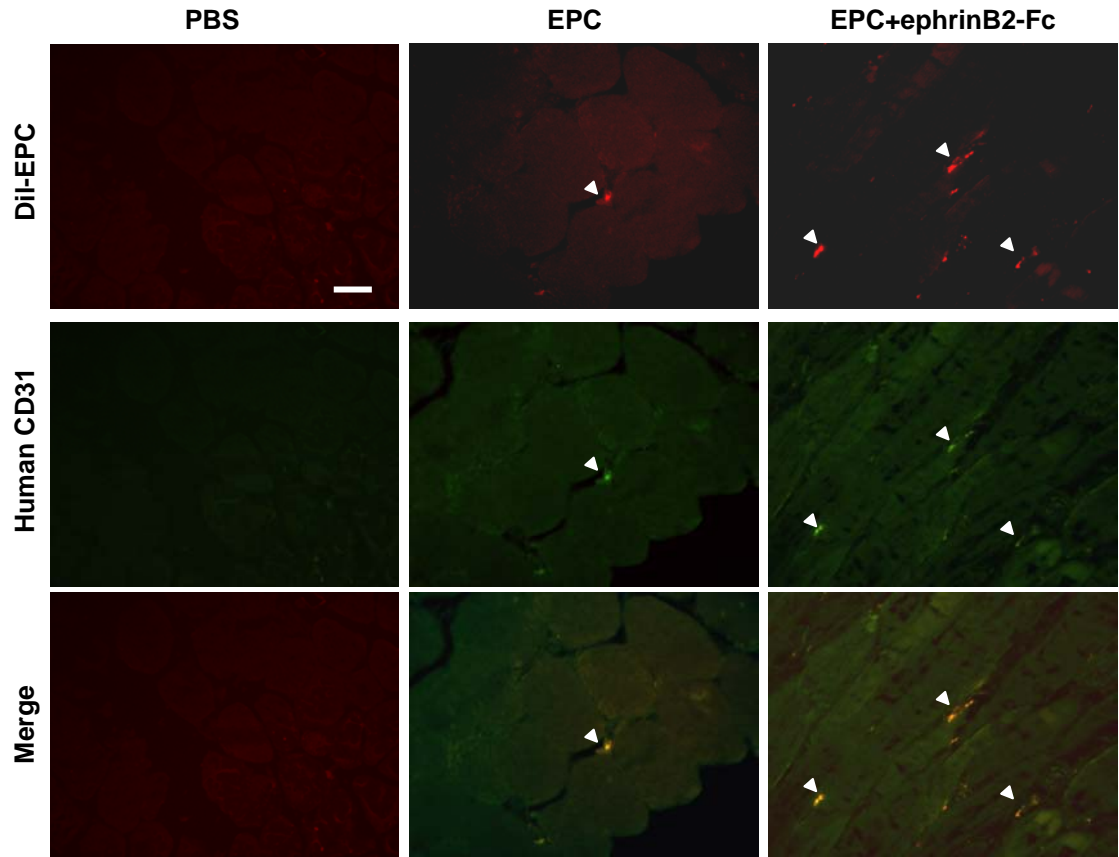

**Supplementary Figure 4**

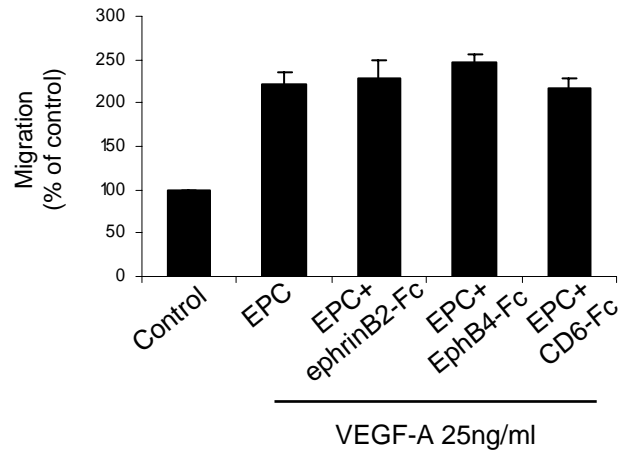

**Supplementary Figure 5**

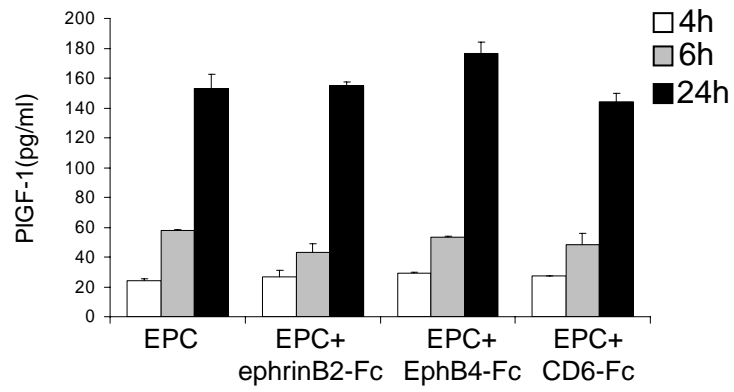

## **Legend to supplementary figures**

### **Supplementary Figure 1**

#### **EphB4 and ephrin-B2 expression on EPCs.**

RT-PCR and immunocytochemical analysis of EphB4 and ephrin-B2 expression. Glyceraldehyde-3-phosphate dehydrogenase (GAPDH) served as control for PCR. For immunocytochemistry the control used was an isotypic IgG. Scale bar: 10  $\mu\text{m}$

### **Supplementary Figure 2**

#### **EphB4 and ephrin-B2 expression in ephrin-B2-Fc-stimulated EPCs.**

EPCs were treated with ephrin-B2-Fc (3  $\mu\text{g/ml}$ ) for 6h or 24h. RT-PCR (**A**) and immunofluorescence studies (**B**) were performed to analyse EphB4 and ephrin-B2 expression. GAPDH was used as a loading control. Ephrin-B1 was included because it is not an arterial or venous marker. Scale bar: 20  $\mu\text{m}$

### **Supplementary Figure 3**

#### **Detection of EPCs in ischemic muscle.**

EPCs were labeled with CM-Dil and then pre-treated 3  $\mu\text{g/ml}$  ephrin-B2-Fc before injection. The gastrocnemius muscles were harvested 4 days after injection of the labeled EPCs. To demonstrate the human origin of the incorporated labeled cells, tissue sections were processed for immunocytochemistry with a biotinylated mouse anti-human CD31 antibody. Dil-positive cells appear in red and CD31-positive cells in green, with co-localization (Merge) revealed by the yellow color. Tissue sections were examined using confocal microscopy. Arrows indicate labeled EPCs. Scale bar: 20  $\mu\text{m}$ .

## **Supplementary Figure 4**

### **EPC migration toward VEGF-A.**

Migration was assessed using a modified Boyden chamber system. EPCs were either stimulated or left un-stimulated and then seeded on the upper chamber. VEGF-A was added to the lower chamber. Results were expressed as % of control EPC without VEGF-A.

## **Supplementary Figure 5**

### **ELISA detection of PlGF-1 in EPC-conditioned media.**

Equal numbers of EPCs were seeded in culture plates and conditioned media were harvested at various times for ELISA quantification.
